# Supplementary material for: Association of visceral adiposity and clinical outcome among patients with aldosterone producing adenoma
Source: PubMed Central journal article supplement — BMJ Open Diabetes Res Care. 2020 Jul 26;8(1):e001153. doi: 10.1136/bmjdrc-2019-001153 (PMC7383952; doi:10.1136/bmjdrc-2019-001153), 2020-07-26
Supplement: bmjdrc-2019-001153supp001.pdf [file bmjdrc-2019-001153supp001.pdf]

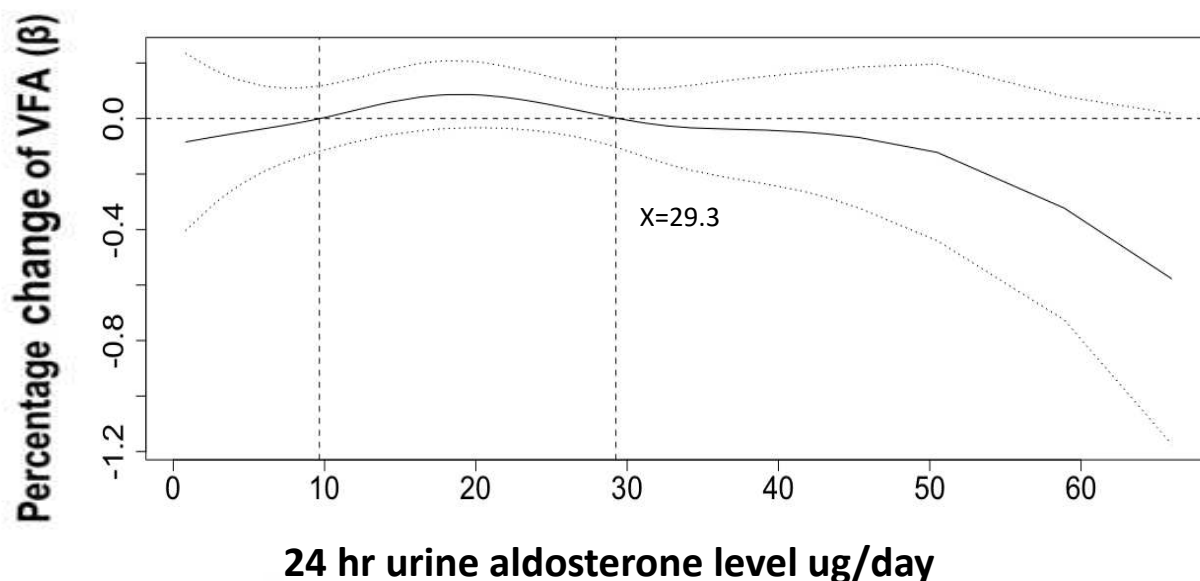

**Supplementary figure S1. A trend of inverse association between log VFA and high 24-hour urine aldosterone level, especially when greater than 29.3 ug/day GAM with an adjusted spline of urine aldosterone with log VFA. The plots were incorporated with the subject-specific (longitudinal) random effects to predict the association. Each curve is centered to have an average of zero over the range of the data. The *dashed lines* indicate approximated point-wise 95% CI. \*Abbreviations: APA, aldosterone-producing adenoma; CI, confidence interval; GAM, generalized additive model; VFA, visceral fat area \*Data are expressed as mean  $\pm$  standard deviation (SD) unless otherwise indicated.**
