# Supplementary material for: Association of visceral adiposity and clinical outcome among patients with aldosterone producing adenoma
Source: PubMed Central journal article supplement — BMJ Open Diabetes Res Care. 2020 Jul 26;8(1):e001153. doi: 10.1136/bmjdrc-2019-001153 (PMC7383952; doi:10.1136/bmjdrc-2019-001153), 2020-07-26
Supplement: bmjdrc-2019-001153supp002.pdf [file bmjdrc-2019-001153supp002.pdf]

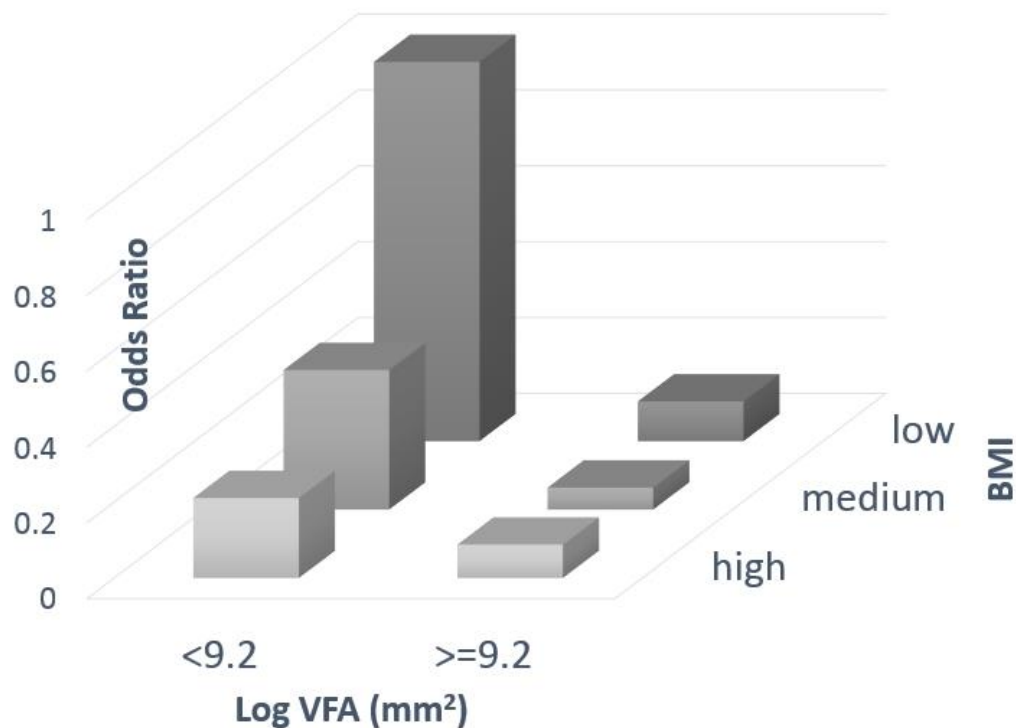

**Supplementary figure S2. Odd ratios of each subgroup for predicting the cure of hypertension. Six subgroups were constructed by stratified BMI into tertile values and combined with log VFA which was either larger or smaller than 9.2. Size of VFA could predict the cure of hypertension, yet stratification into tertiles according to BMI could not.**

\*Abbreviations: APA, aldosterone-producing adenoma; BMI, body mass index; VFA, visceral fat area
